# Supplementary material
Source: Royal Society of Chemistry journal article supplement (doi:10.1039/d6nj00527f)
Supplement: d6nj00527f1.pdf [file d6nj00527f1.pdf]

## Supporting Information

Enhanced linear range glucose biosensor based on a prussian  
blue/glucose oxidase composite with a tailored polyurethane diffusion-  
limiting membrane

Xia Liu<sup>a</sup>, Lu Liu<sup>a</sup>, Yu Tang<sup>a</sup>, Hongying Liu<sup>\*ab</sup> and Xitian Pi<sup>\*ab</sup>

*a Key Laboratory of Biorheological Science and Technology (Chongqing University), Ministry of Education, Chongqing 400045, China.*

*E-mail: liuhongying@cqu.edu.cn, pixitian@cqu.edu.cn*

*b Chongqing Engineering Technology Research Center of Medical Electronic, Chongqing, 400030, China.*

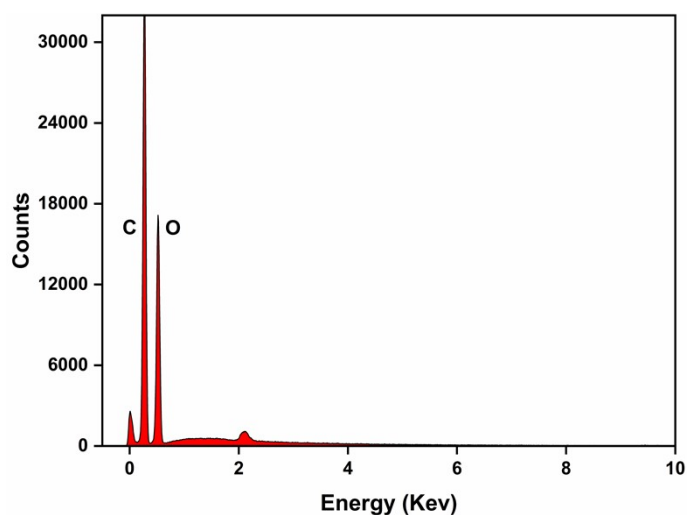

Fig S1 EDS spectra of outer single-component PU membrane

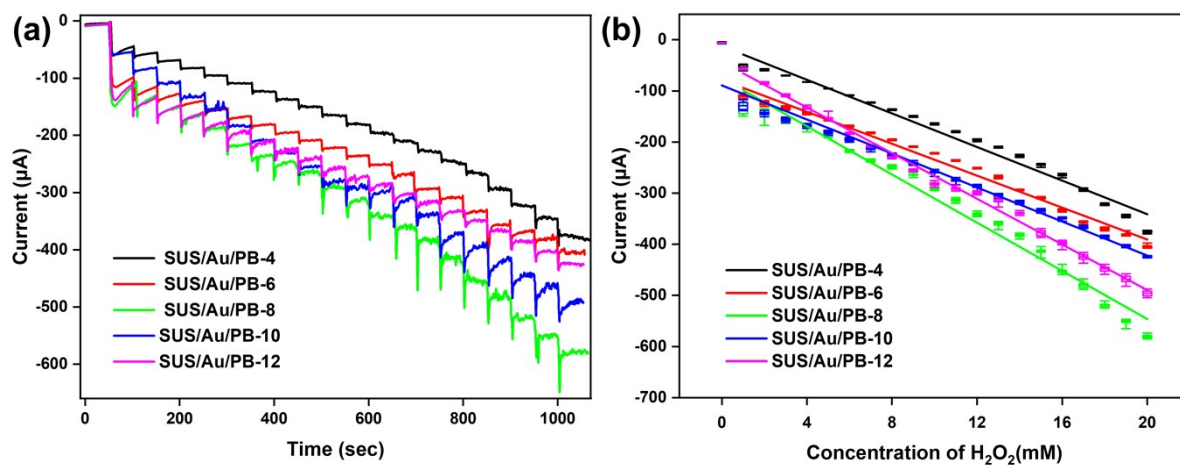

Fig. S2 Amperometric response of various SUS/Au/PB/Nafion electrodes with continuous addition of 1 mM  $\text{H}_2\text{O}_2$  at a potential of -0.1 V, and (b) the corresponding current-concentration linear fitting results

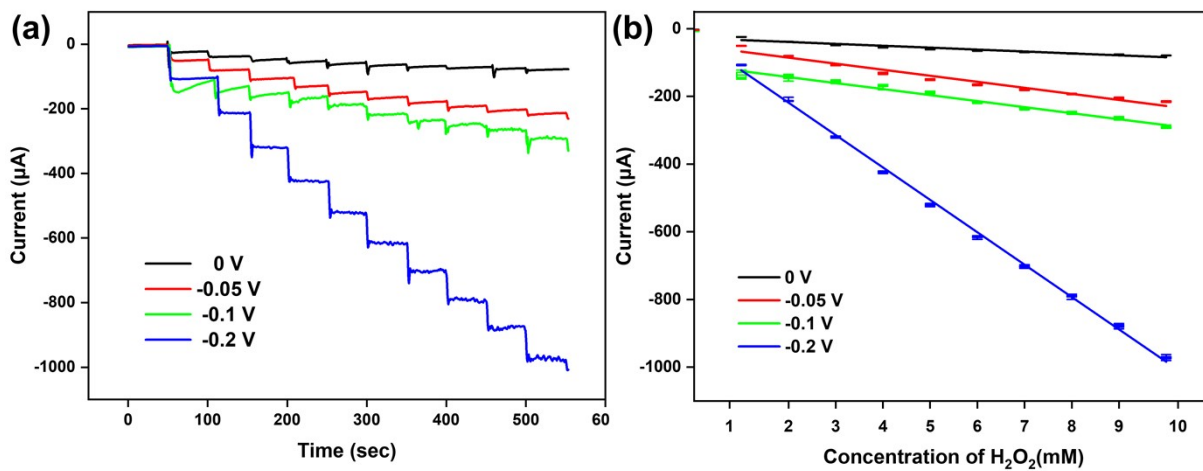

Fig. S3 Amperometric response of various SUS/Au/PB/Nafion electrodes with continuous addition of 1 mM  $\text{H}_2\text{O}_2$  at different potential, and (b) the corresponding current-concentration linear fitting results
